# Supplementary material for: Quantum-sized topological insulators/semimetals enable ultrahigh and broadband saturable absorption
Source: Royal Society of Chemistry journal article supplement (doi:10.1039/d3nh00282a), 2023-01-01
Supplement: d3nh00282a1.pdf [file d3nh00282a1.pdf]

## Supporting Information

### Quantum-sized topological insulator/semimetal enables ultrahigh and broadband saturable absorption

Zhexue Chen<sup>a,b</sup>, Xinyu Sui<sup>b,c</sup>, Zhangqiang Li<sup>a,b</sup>, Yueqi Li<sup>a,b</sup>,  
Xinfeng Liu<sup>b,c</sup>, Yong Zhang<sup>\*,a,b</sup>

<sup>a</sup> CAS Key Laboratory of Nanosystem and Hierarchical Fabrication, CAS Center for Excellence in Nanoscience, National Center for Nanoscience and Technology, Beijing 100190, P. R. China

<sup>b</sup> University of Chinese Academy of Sciences, Beijing 100049, P. R. China

<sup>c</sup> CAS Key Laboratory of Standardization and Measurement for Nanotechnology, CAS Center for Excellence in Nanoscience, National Center for Nanoscience and Technology, Beijing 100190, P. R. China

\* E-mail: [zhangyong@nanoctr.cn](mailto:zhangyong@nanoctr.cn)

## Experimental Section

**Materials.** Bismuth selenide ( $\text{Bi}_2\text{Se}_3$ , 99.99%), Antimony telluride ( $\text{Sb}_2\text{Te}_3$ , 99.96%), Titanium sulfide ( $\text{TiS}_2$ , 99.9%), tetraethyl orthosilicate (TEOS), N-methyl-2-pyrrolidone (NMP), dimethylformamide (DMF), and tetrahydrofuran (THF) were purchased from Shanghai Macklin Biochemical Co., Ltd. *N*-hexane, acetone, isopropanol (IPA), ethanol, and aqueous ammonia (25-28 wt%) were purchased from Tianjin Yongda Chemical Reagent Co., Ltd. Porous anodic alumina (PAA) (0.02  $\mu\text{m}$  pore size) was purchased from Whatman. All of the materials were used as received. Deionized water was used in the experiments.

**Production of the QSs.** The production of  $\text{Bi}_2\text{Se}_3$  QSs,  $\text{Sb}_2\text{Te}_3$  QSs, and  $\text{TiS}_2$  QSs from their bulk layered materials was realized by an all-physical top-down method (i.e., combination of silica-assisted ball-milling, sonication-assisted solvent exfoliation) that has been described in detail in our previous work.<sup>S1</sup>

**Fabrication of the QSs-PMMA thin films:** The QSs-PMMA hybrid thin films were fabricated through solution processing. In brief, PMMA was dissolved in NMP to form a 400  $\text{mg mL}^{-1}$  solution. Meanwhile, the QS powders were dispersed in NMP to form 1  $\text{mg mL}^{-1}$  dispersions. Based on the pre-designed loading contents and the as-required constant total weight, the PMMA solution and QS dispersions were mixed by vigorous stirring and sonication. The mixture with known volume was dropped into a PTFE mold (a 8 $\mu\text{m}$  thick polyimide film as the releasing layer). After complete removal of the solvent from the evenly spreading mixture by moderate heating (70  $^\circ\text{C}$ ) overnight on a hot plate, the QSs-PMMA thin films were obtained.

**Characterization:** Scanning electron microscopy (SEM) images were acquired using a Hitachi SU8220 microscope. Transmission electron microscopy (TEM) images and high-resolution TEM (HRTEM) images were acquired using an FEI Tecnai F20 U-TWIN microscope operated at 200 kV. Atomic force microscopy (AFM) images were acquired using a Bruker MultiMode 8 AFM using SCANASYST-AIR

cantilevers with a nominal tip radius of 2 nm in a scanasyst mode. Zeta potential measurements were conducted using a Malvern Zetasizer Nano ZS analyzer. X-ray diffraction (XRD) patterns were recorded using D/Max-TTRIII (CBO) with Cu K $\alpha$  radiation ( $\lambda=1.54056 \text{ \AA}$ ). Raman spectra were recorded using a Renishaw inVia Plus spectrometer with a 514 nm laser. X-ray photoelectron spectroscopy (XPS) measurements were conducted using an ESCALAB 250Xi electron spectrometer from VG Scientific with 300 W Al K $\alpha$  radiation. Ultraviolet-visible (UV-vis) absorption spectra were recorded using a Lambda 950 spectrophotometer from PerkinElmer. The optical bandgaps of various QDs were extracted according to the Tauc plots

$$(\alpha \cdot hv)^n = C(hv - E_g)$$

where  $\alpha$  is the diffuse absorption coefficient at wavelength  $\lambda$ ,  $h$  is the Planck's constant,  $\nu$  is the light frequency,  $n$  is 2 or 0.5 for direct and indirect transitions, respectively,  $C$  is constant, and  $E_g$  is optical bandgap of materials. Photoluminescence (PL) measurements were conducted using a HORIBA FluoroMax+ spectrofluorometer with varying excitation wavelengths. Nonlinear absorption measurements were performed with 100 fs pulses from a Coherent Astrella regenerative amplifier. The laser was operated at 532 nm and 800 nm wavelength with a pulse repetition rate of 1 kHz. All photographs were acquired with a digital camera.

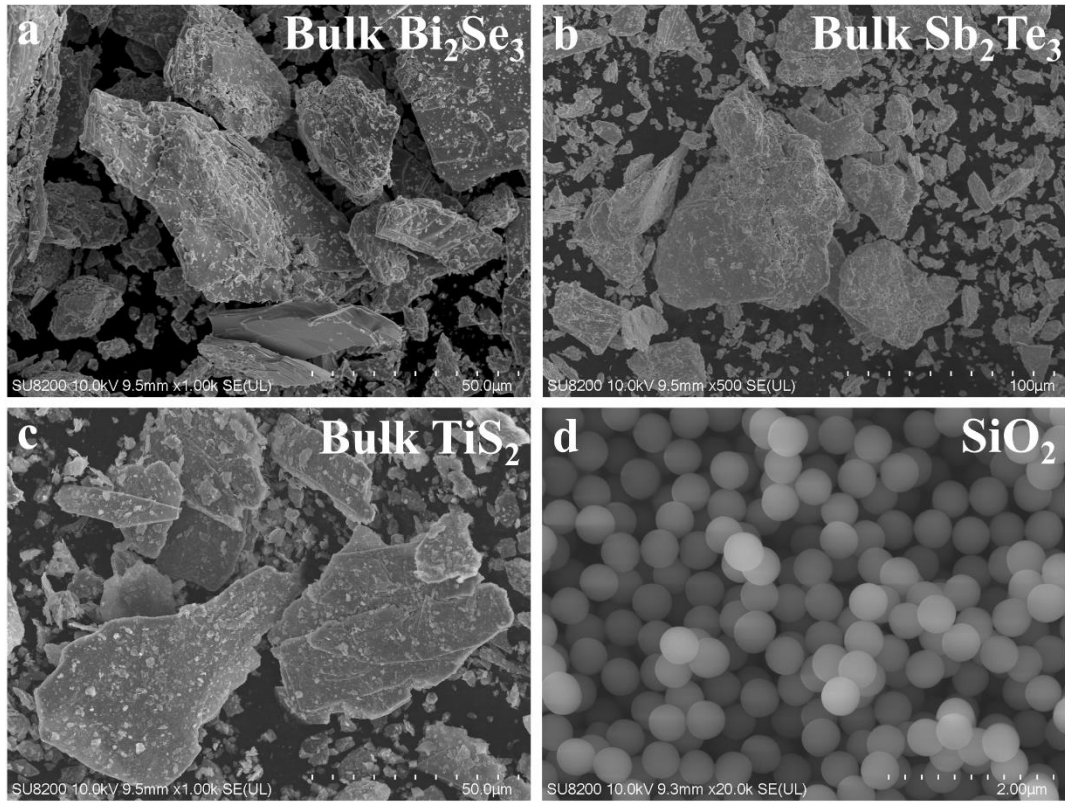

**Figure S1.** SEM images of bulk layered materials and silica microspheres. (a)  $\text{Bi}_2\text{Se}_3$ , (b)  $\text{Sb}_2\text{Te}_3$ , (c)  $\text{TiS}_2$ , (d)  $\text{SiO}_2$ .

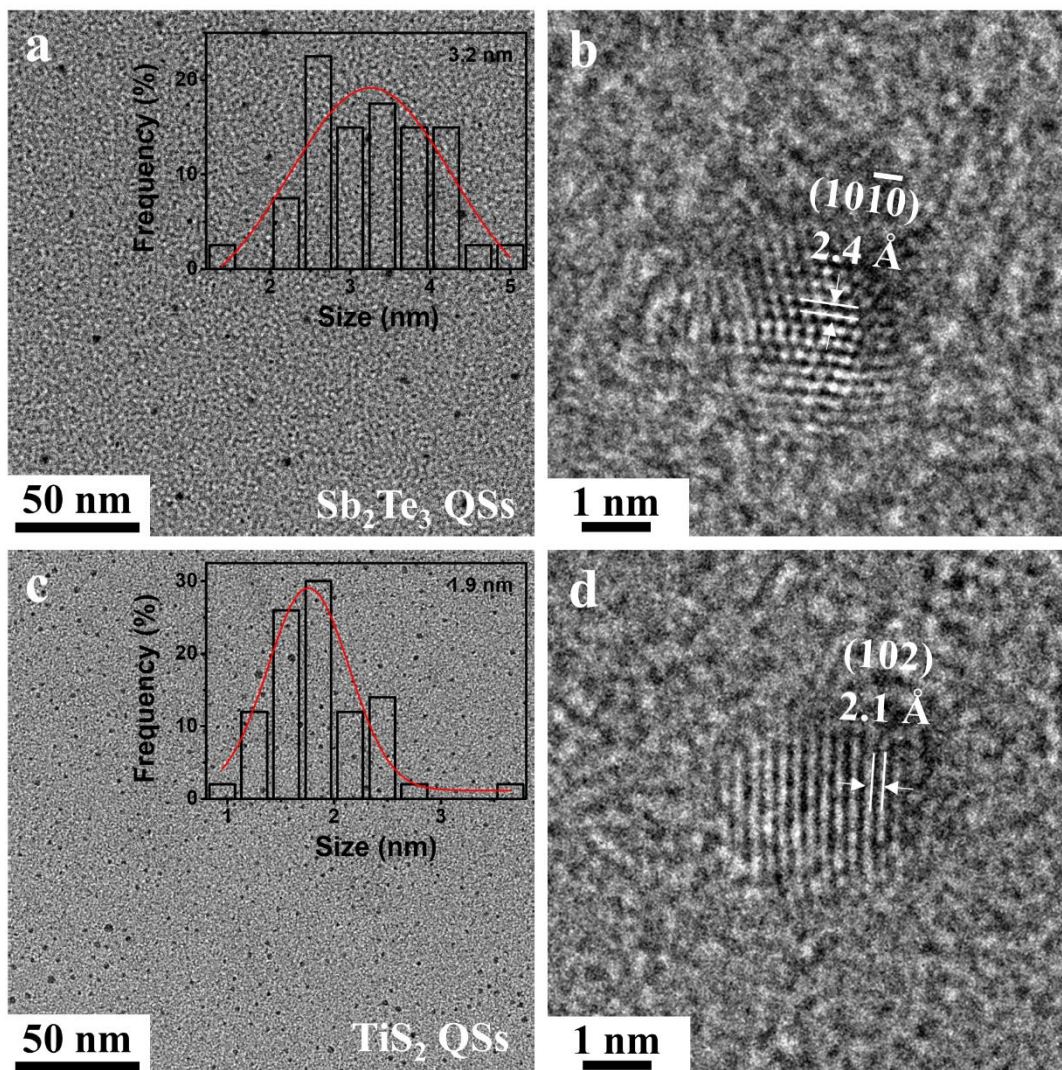

**Figure S2.** TEM images of (a)  $\text{Sb}_2\text{Te}_3$  QDs and (c)  $\text{TiS}_2$  QDs (insets showing the lateral size distributions). HRTEM images of (b)  $\text{Sb}_2\text{Te}_3$  QDs and (d)  $\text{TiS}_2$  QDs.

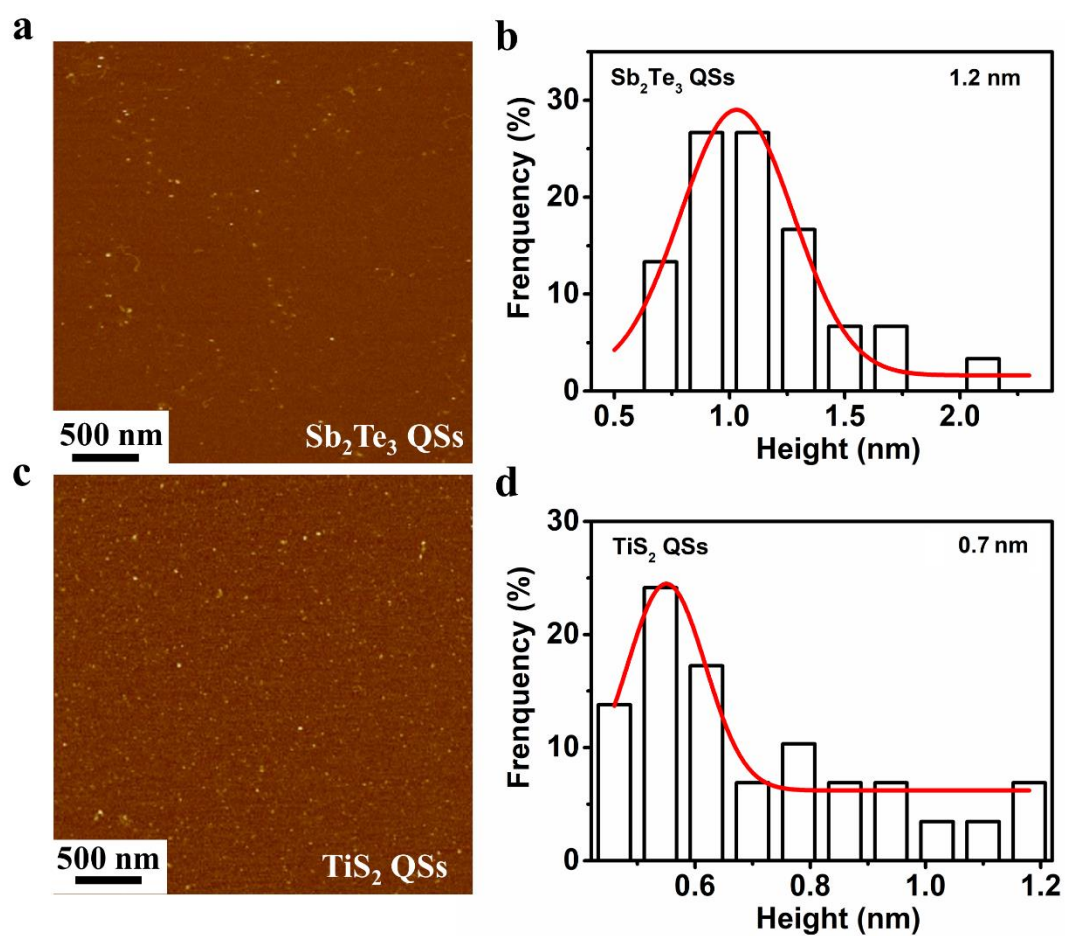

**Figure S3.** AFM images (left) and corresponding height distributions (right) of (a-b)  $\text{Sb}_2\text{Te}_3$  QDs and (c-d)  $\text{TiS}_2$  QDs.

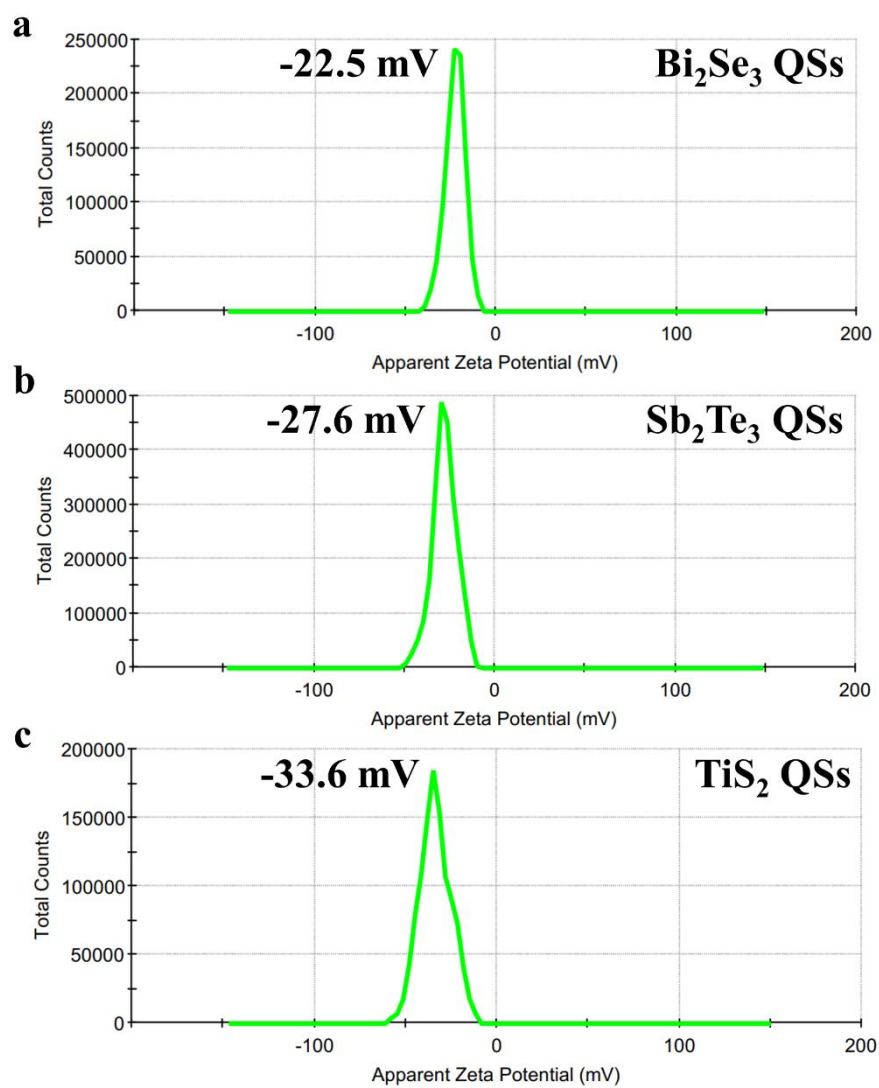

**Figure S4.** Zeta potentials of the QS aqueous dispersions: (a)  $\text{Bi}_2\text{Se}_3$  QSs, (b)  $\text{Sb}_2\text{Te}_3$  QSs and (c)  $\text{TiS}_2$  QSs, respectively. The concentration for each dispersion is fixed at  $0.1 \text{ mg mL}^{-1}$ .

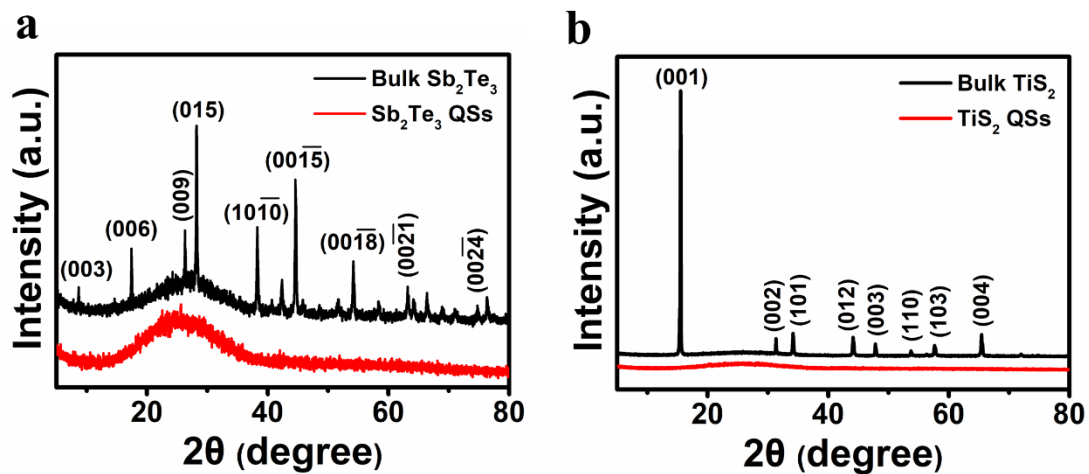

**Figure S5.** XRD patterns of (a) Sb<sub>2</sub>Te<sub>3</sub> QDs and (b) TiS<sub>2</sub> QDs. Data for bulk materials are shown for comparison.



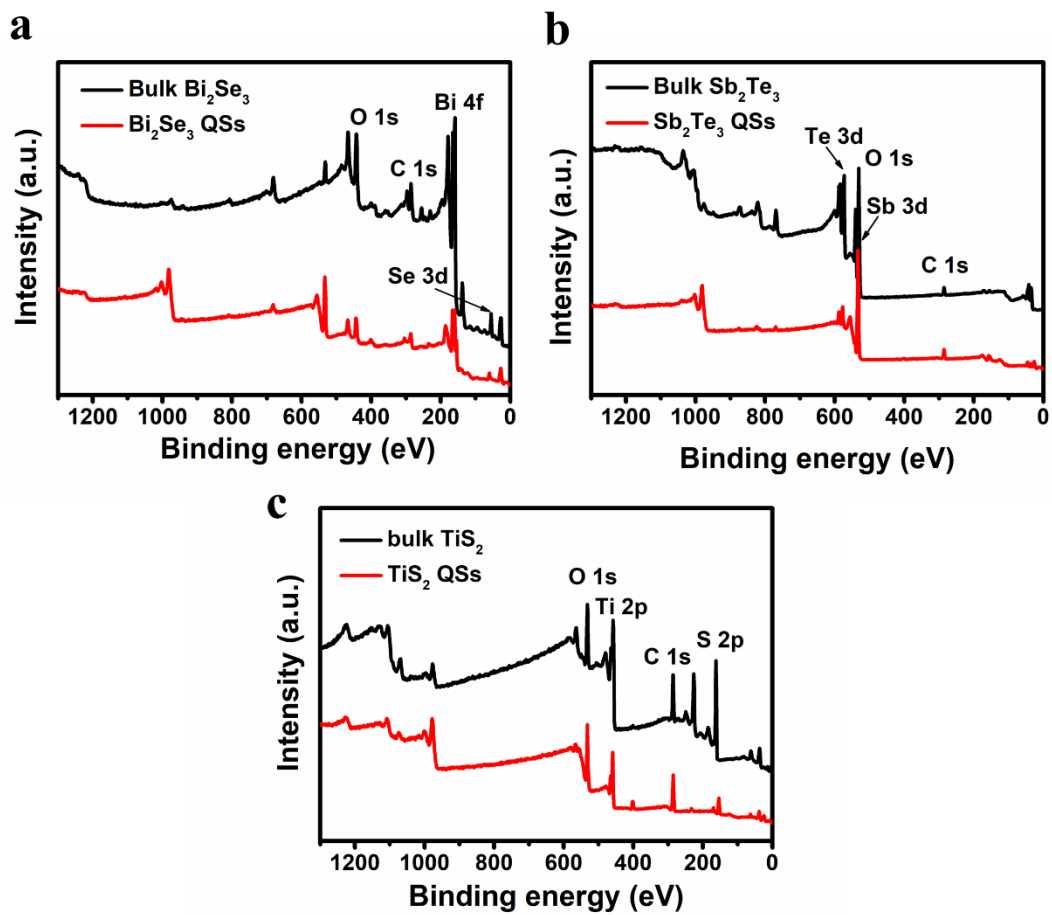

**Figure S6.** XPS full spectra of (a) Bi<sub>2</sub>Se<sub>3</sub> QDs, (b) Sb<sub>2</sub>Te<sub>3</sub> QDs and (c) TiS<sub>2</sub> QDs, respectively. Data for bulk materials are shown for comparison.

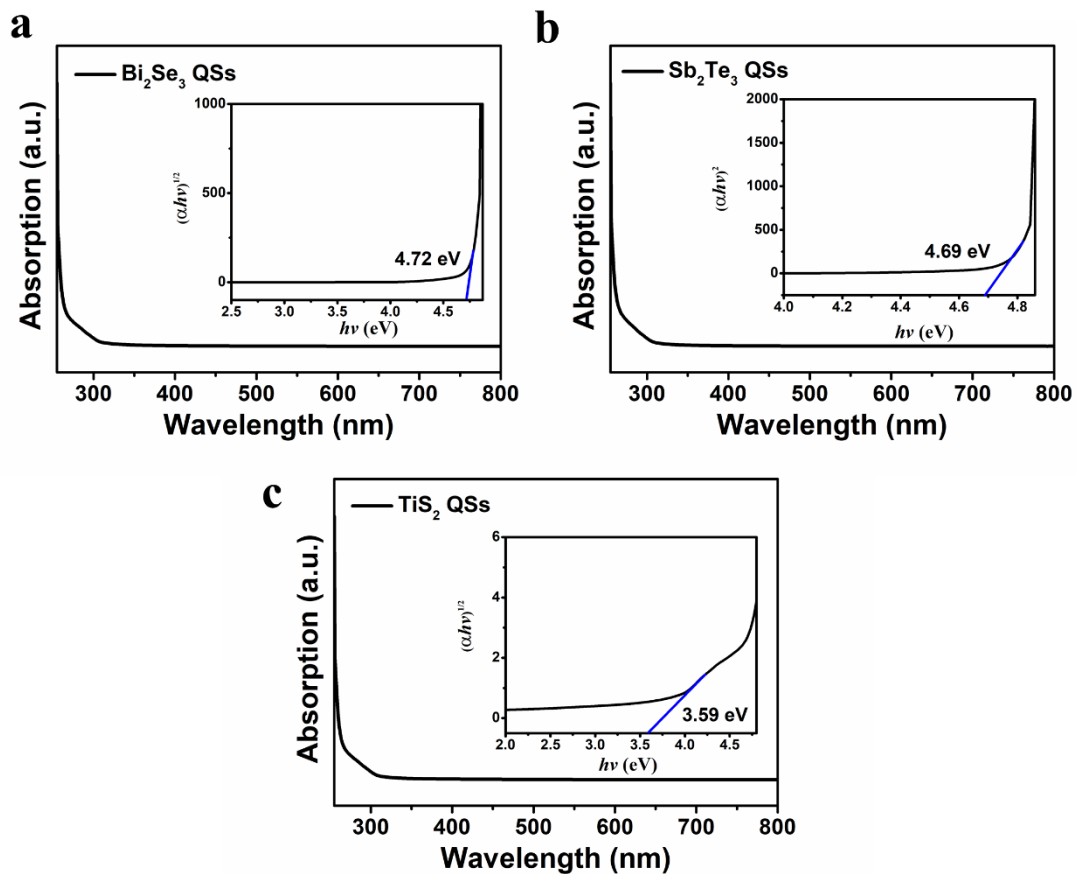

**Figure S7.** UV-vis absorption spectra (QS/NMP,  $0.01 \text{ mg mL}^{-1}$ ) (insets showing the Tauc analyses) of (a)  $\text{Bi}_2\text{Se}_3$  QSs, (b)  $\text{Sb}_2\text{Te}_3$  QSs and (c)  $\text{TiS}_2$  QSs, respectively.

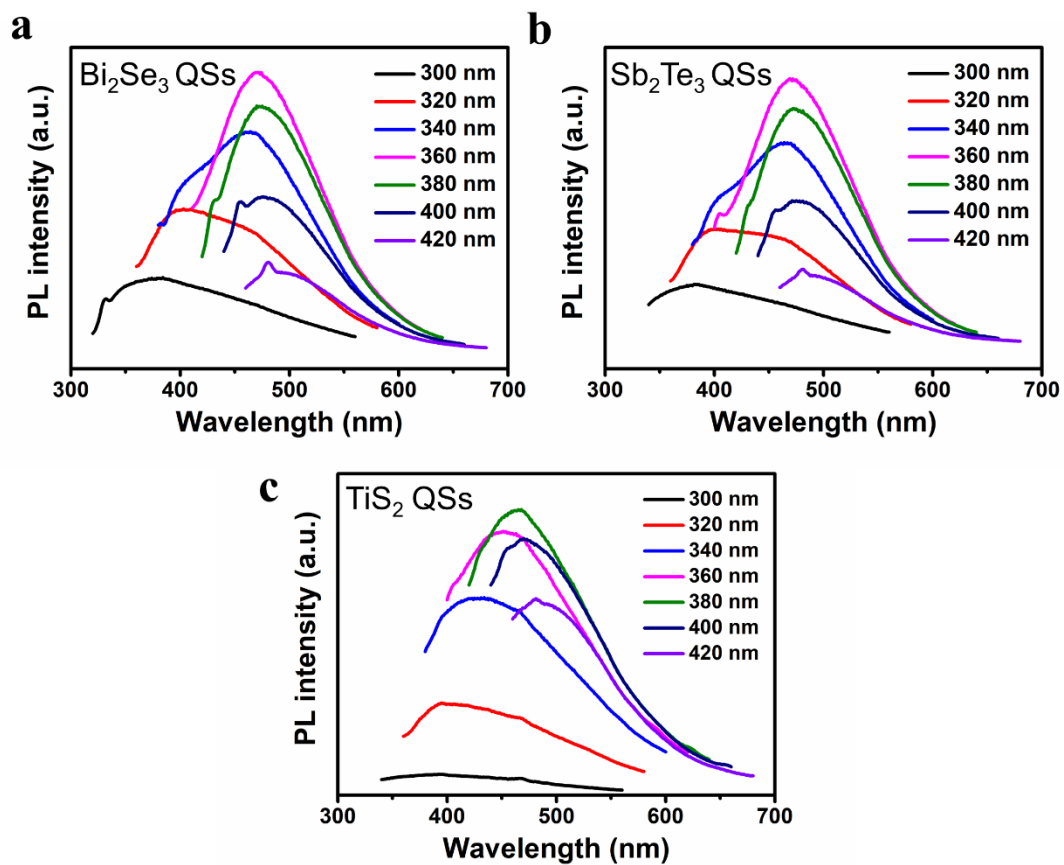

**Figure S8.** PL spectra of the QS/NMP dispersions at varying excitation wavelengths. (a) Bi<sub>2</sub>Se<sub>3</sub> QSs, (b) Sb<sub>2</sub>Te<sub>3</sub> QSs and (c) TiS<sub>2</sub> QSs, respectively.

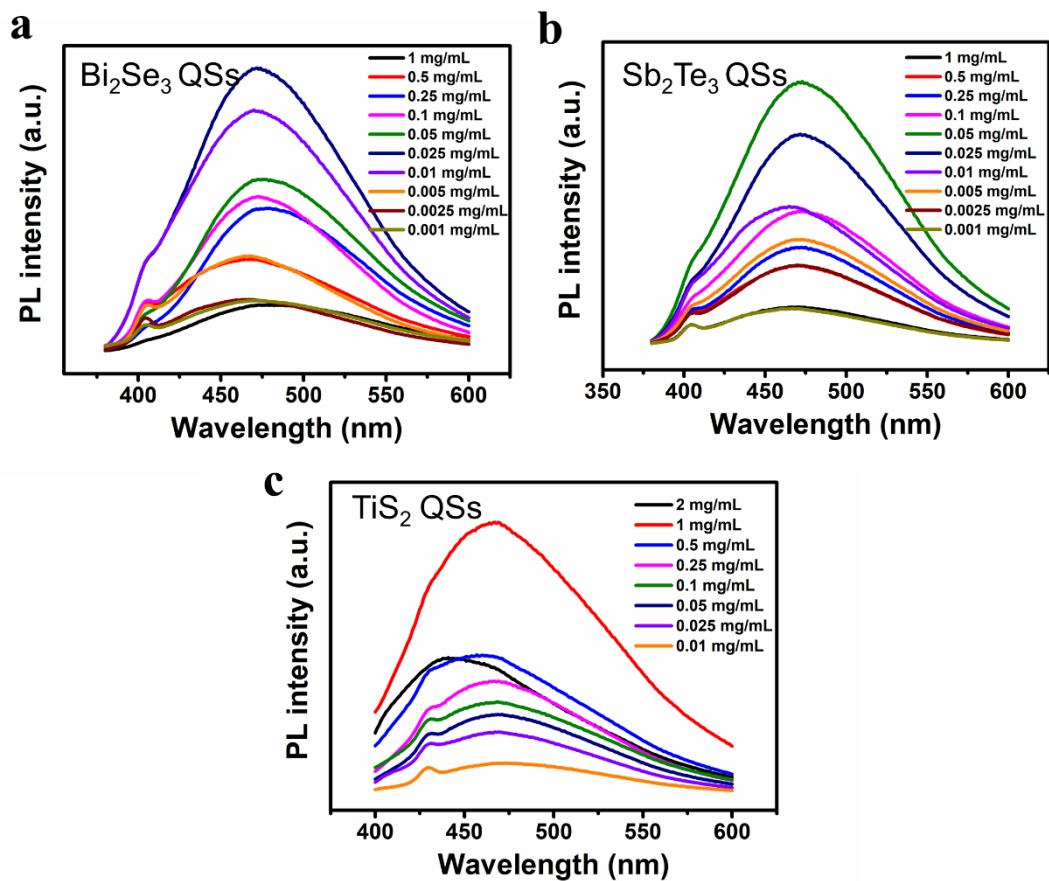

**Figure S9.** PL spectra of the QS/NMP dispersions at varying concentrations. (a) Bi<sub>2</sub>Se<sub>3</sub> QSs, (b) Sb<sub>2</sub>Te<sub>3</sub> QSs and (c) TiS<sub>2</sub> QSs, respectively.

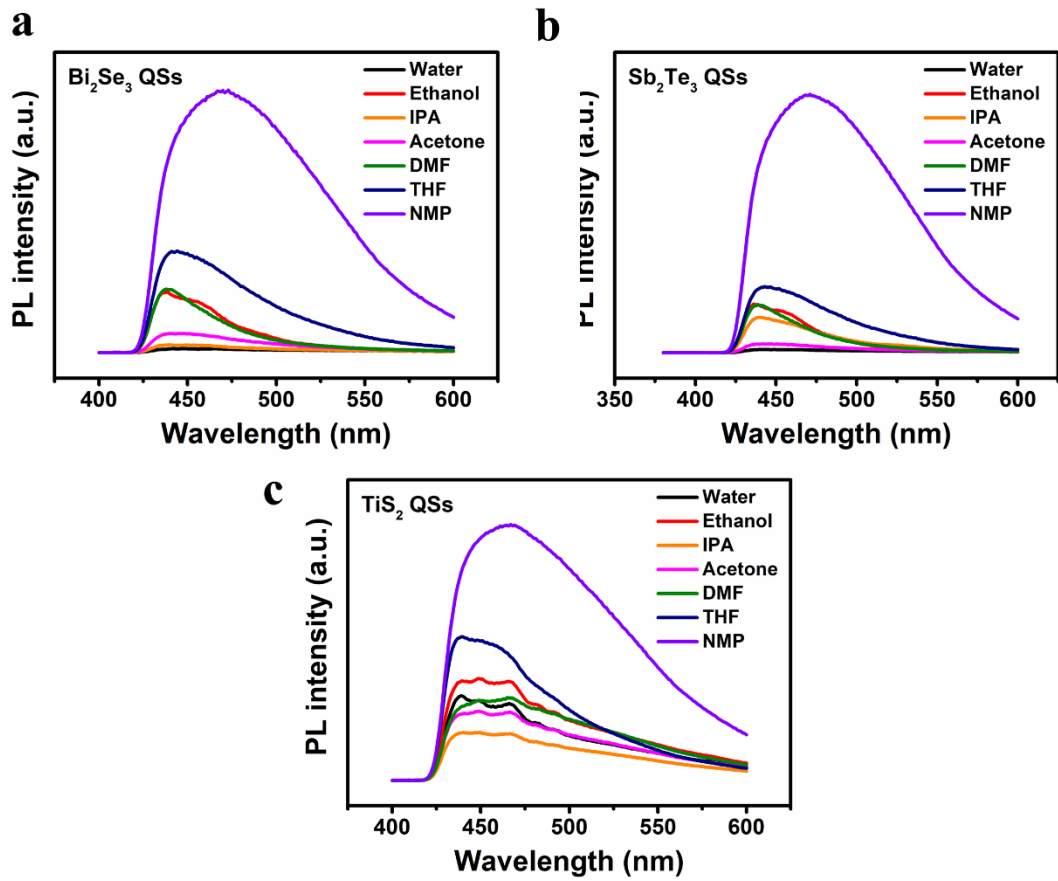

**Figure S10.** PL spectra of the QS dispersions in varying solvents. (a) Bi<sub>2</sub>Se<sub>3</sub> QSs, (b) Sb<sub>2</sub>Te<sub>3</sub> QSs and (c) TiS<sub>2</sub> QSs, respectively.

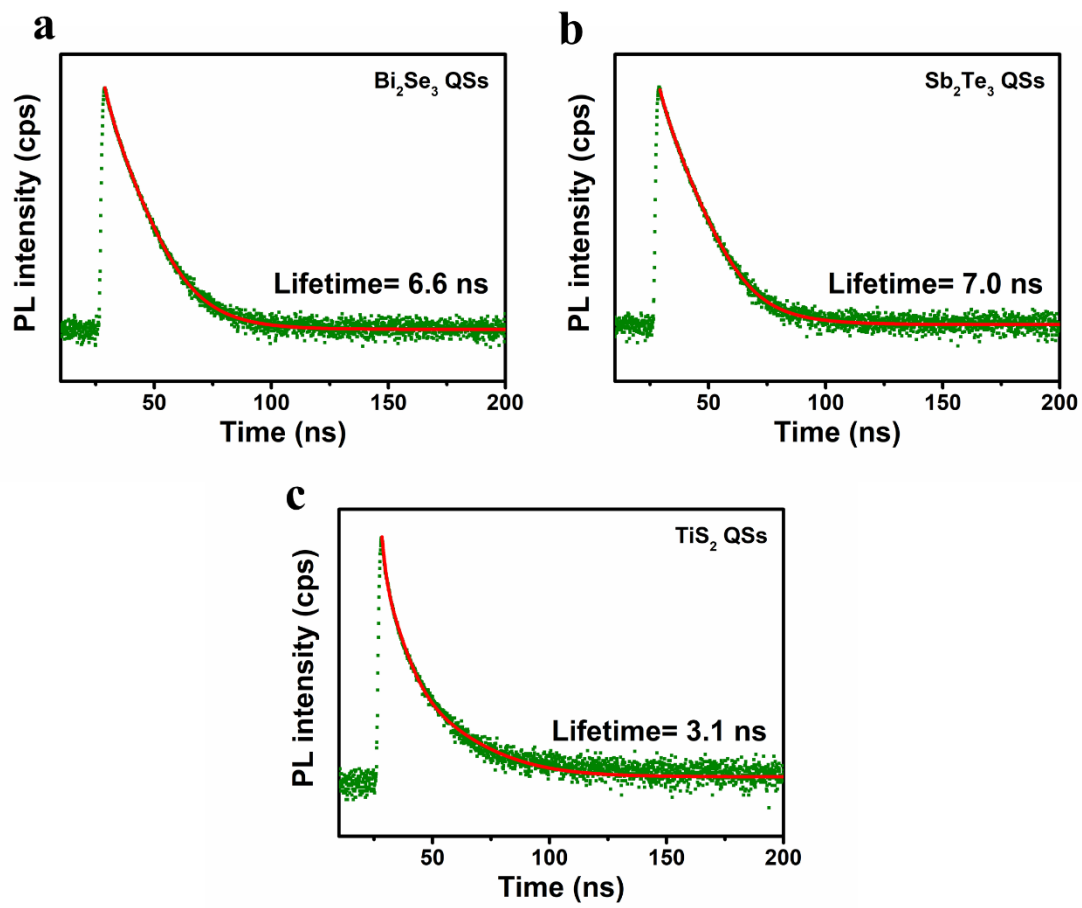

**Figure S11.** Time-resolved PL decay profiles of the QS/NMP dispersions upon 370 nm excitation wavelength. (a)  $\text{Bi}_2\text{Se}_3$  QSs, (b)  $\text{Sb}_2\text{Te}_3$  QSs and (c)  $\text{TiS}_2$  QSs, respectively.

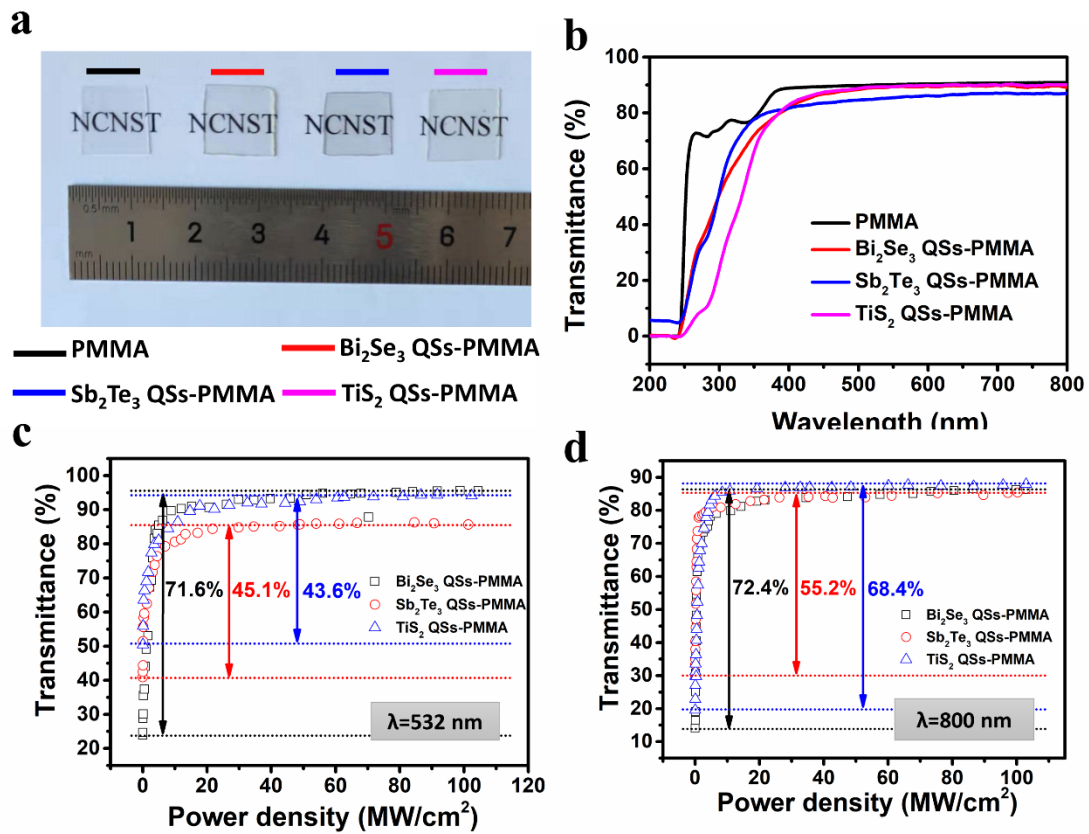

**Figure S12.** NLO performances of the QS solid thin films (0.1 wt%). (a) Photographs of the QSs-PMMA hybrid thin films. (b) UV-vis absorption spectra of the thin films. (c,d) Nonlinear saturable absorption curves. The incident laser beam was as follows: wavelength of (c) 532 nm and (d) 800 nm, pulse of 100 fs, and repetition rate of 1 kHz.

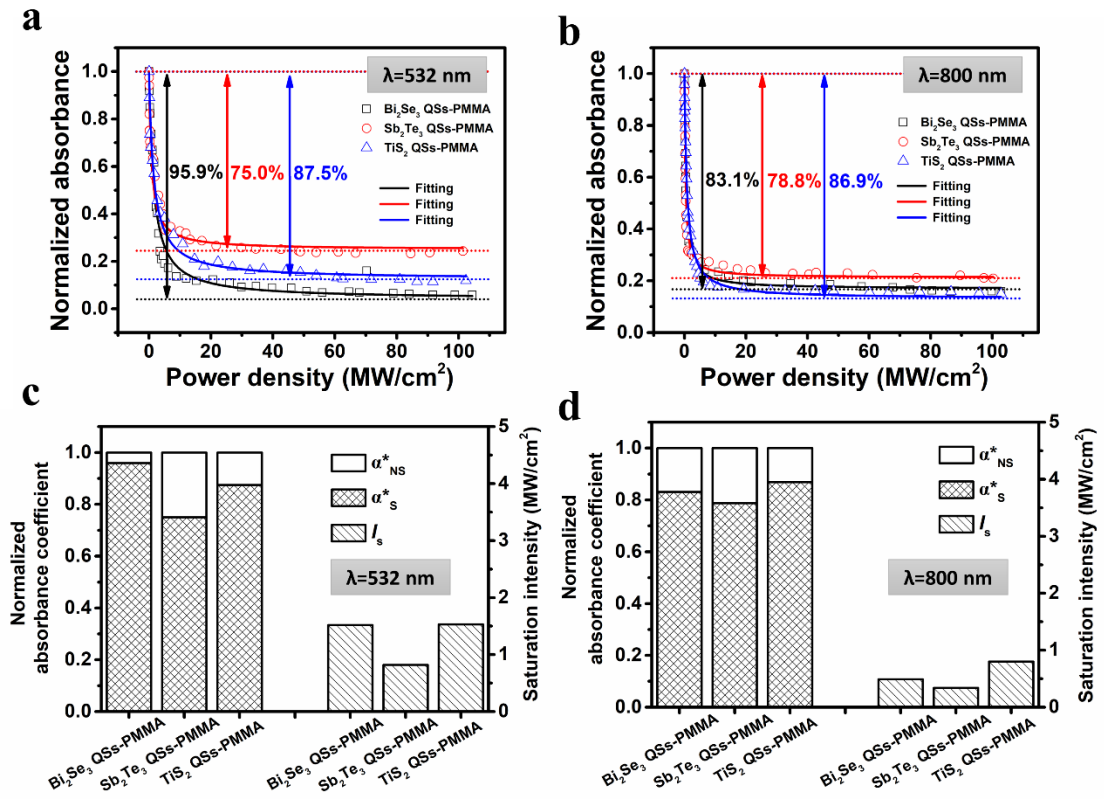

**Figure S13.** (a,b) Normalized absorption curves of the QS solid thin films: (a) 532 nm, (b) 800 nm. The hollow dots are the experimental data, and the solid curves are analytical fits to the data. (c,d) Plots of the normalized absorption coefficient and saturation intensity: (c) 532 nm, (d) 800 nm.



**Table S1.** Comparison of the NSA performances of topological insulators/semimetals from different works

| Years | Materials                       | $\lambda$<br>(nm) | Absolute MD<br>(%) | $I_{\text{sat}}$<br>(MW/cm <sup>2</sup> ) | References |
|-------|---------------------------------|-------------------|--------------------|-------------------------------------------|------------|
| 2013  | Bi <sub>2</sub> Se <sub>3</sub> | 1568.5            | 41.2               | 101.8                                     | S2         |
| 2013  | Bi <sub>2</sub> Se <sub>3</sub> | 800               | 61.2               | 1.012×10 <sup>4</sup>                     | S3         |
| 2014  | Bi <sub>2</sub> Se <sub>3</sub> | 800               | 3.7                | 41                                        | S4         |
| 2014  | Bi <sub>2</sub> Se <sub>3</sub> | --                | 3.9                | 12                                        | S5         |
| 2014  | Bi <sub>2</sub> Se <sub>3</sub> | --                | 5.2                | 580                                       | S6         |
| 2015  | Bi <sub>2</sub> Se <sub>3</sub> | --                | 3.8                | 25                                        | S7         |
| 2015  | Bi <sub>2</sub> Se <sub>3</sub> | --                | 4.1                | 26                                        | S8         |
| 2016  | Bi <sub>2</sub> Se <sub>3</sub> | --                | 3.4                | 31.5                                      | S9         |
| 2016  | Bi <sub>2</sub> Se <sub>3</sub> | 1030              | 7.6                | 38.9                                      | S10        |
| 2017  | Bi <sub>2</sub> Se <sub>3</sub> | --                | 12                 | 77                                        | S11        |
| 2017  | Bi <sub>2</sub> Se <sub>3</sub> | 1558              | 39.8               | 90.2                                      | S12        |
| 2018  | Bi <sub>2</sub> Se <sub>3</sub> | 1560              | 5                  | 1.8                                       | S13        |
| 2019  | Bi <sub>2</sub> Se <sub>3</sub> | 1560              | 15                 | 6.59                                      | S14        |
| 2019  | Bi <sub>2</sub> Se <sub>3</sub> | 1580              | 15.7               | 81.1                                      | S15        |
| 2020  | Bi <sub>2</sub> Se <sub>3</sub> | 1985              | 9.9                | --                                        | S16        |
| 2022  | Bi <sub>2</sub> Se <sub>3</sub> | 532               | 71.6               | 1.52                                      | This work  |
| 2022  | Bi <sub>2</sub> Se <sub>3</sub> | 800               | 72.4               | 0.49                                      | This work  |
| 2014  | Sb <sub>2</sub> Te <sub>3</sub> | --                | 3.9                | 106                                       | S17        |
| 2014  | Sb <sub>2</sub> Te <sub>3</sub> | 1554              | 6                  | 31                                        | S18        |
| 2015  | Sb <sub>2</sub> Te <sub>3</sub> | 1558              | 13                 | 1.25×10 <sup>3</sup>                      | S19        |

|      |                                 |      |      |                      |           |
|------|---------------------------------|------|------|----------------------|-----------|
| 2015 | Sb <sub>2</sub> Te <sub>3</sub> | 1550 | 14.9 | 228                  | S20       |
| 2016 | Sb <sub>2</sub> Te <sub>3</sub> | 1568 | 6.2  | 143                  | S21       |
| 2016 | Sb <sub>2</sub> Te <sub>3</sub> | 1562 | 7.42 | 175                  | S22       |
| 2018 | Sb <sub>2</sub> Te <sub>3</sub> | 1864 | 38   | 3.3                  | S23       |
| 2019 | Sb <sub>2</sub> Te <sub>3</sub> | 1560 | 1.99 | 16.4                 | S24       |
| 2022 | Sb <sub>2</sub> Te <sub>3</sub> | 532  | 45.1 | 0.82                 | This work |
| 2022 | Sb <sub>2</sub> Te <sub>3</sub> | 800  | 55.2 | 0.34                 | This work |
| 2018 | TiS <sub>2</sub>                | 1560 | 8.3  | --                   | S25       |
| 2018 | TiS <sub>2</sub>                | 800  | 62   | 1.21×10 <sup>3</sup> | S26       |
| 2021 | TiS <sub>2</sub>                | --   | 5.08 | 10.62                | S27       |
| 2022 | TiS <sub>2</sub>                | 532  | 43.6 | 1.53                 | This work |
| 2022 | TiS <sub>2</sub>                | 800  | 68.4 | 0.80                 | This work |

## References

- S1. Xu, Y.; Chen, S.; Dou, Z.; Ma, Y.; Mi, Y.; Du, W.; Liu, Y.; Zhang, J.; Chang, J.; Liang, C.; Zhou, J.; Guo, H.; Gao, P.; Liu, X.; Che, Y.; Zhang, Y. Robust production of 2D quantum sheets from bulk layered materials. *Mater. Horiz.* **2019**, *6*, 1416-1424.
- S2. Chen, Y.; Zhao, C.; Huang, H.; Chen, S.; Tang, P.; Wang, Z.; Lu, S.; Zhang, H.; Wen, S.; Tang, D. Self-assembled topological insulator: Bi<sub>2</sub>Se<sub>3</sub> membrane as a passive Q-switcher in an erbium-doped fiber laser. *J. Lightwave Technol.* **2013**, *31*, 2857-2863.
- S3. Lu, S.; Zhao, C.; Zou, Y.; Chen, S.; Chen, Y.; Li, Y.; Zhang, H.; Wen, S.; Tang, D. Third order nonlinear optical property of Bi<sub>2</sub>Se<sub>3</sub>. *Opt. Express* **2013**, *21*, 2072-2082.
- S4. Luo, Z.; Liu, C.; Huang, Y.; Wu, D.; Wu, J.; Xu, H.; Cai, Z.; Lin, Z.; Sun, L.; Weng, J. Topological-insulator passively Q-switched double-clad fiber laser at 2 μm wavelength. *IEEE J. Sel. Top. Quant.* **2014**, *20*, 1-8.
- S5. Liu, H.; Zheng, X.; Liu, M.; Zhao, N.; Luo, A.; Luo, Z.; Xu, W.; Zhang, H.; Zhao, C.; Wen, S. Femtosecond pulse generation from a topological insulator mode-locked fiber laser. *Opt. Express* **2014**, *22*, 6868-6873.
- S6. Dou, Z.; Song, Y.; Tian, J.; Liu, J.; Yu, Z.; Fang, X. Mode-locked ytterbium-doped fiber laser based on topological insulator: Bi<sub>2</sub>Se<sub>3</sub>. *Opt. Express* **2014**, *22*, 24055-24061.
- S7. Guo, B.; Yao, Y.; Tian, J.; Zhao, Y.; Liu, S.; Li, M.; Quan, M. Observation of bright-dark soliton pair in a fiber laser with topological insulator. *IEEE Photon. Technol. Lett.* **2015**, *27*, 701-704.
- S8. Guo, B.; Yao, Y.; Yang, Y.; Yuan, Y.; Jin, L.; Yan, B.; Zhang, J. Dual-wavelength rectangular pulse erbium-doped fiber laser based on topological insulator

- saturable absorber. *Photon. Res.* **2015**, *3*, 94-99.
- S9. Guo, B.; Yao, Y.; Xiao, J.; Wang, R.; Zhang, J. Topological insulator-assisted dual-wavelength fiber laser delivering versatile pulse patterns. *IEEE J. Sel. Top. Quant.* **2016**, *22*, 8-15.
- S10. Li, K.; Tian, J.; Song, Y.; Liu, J.; Guoyu, H.; Xu, R.; Wang, M.; Fang, X. Bi<sub>2</sub>Se<sub>3</sub> as a saturable absorber for ultrafast photonic applications of Yb-doped fiber lasers. *Opt. Eng.* **2016**, *55*, 036110.
- S11. Li, K.; Song, Y.; Tian, J.; Guoyu, H.; Xu, R. Analysis of bound-soliton states in a dual-wavelength mode-locked fiber laser based on Bi<sub>2</sub>Se<sub>3</sub>. *IEEE Photon. J.* **2017**, *9*, 1-9.
- S12. Haris, H.; Harun, S.; Muhammad, A.; Anyi, C.; Tan, S.; Ahmad, F.; Nor, R.; Zulkepely, N.; Arof, H. Passively Q-switched erbium-doped and ytterbium-doped fibre lasers with topological insulator bismuth selenide (Bi<sub>2</sub>Se<sub>3</sub>) as saturable absorber. *Opt. Laser Technol.* **2017**, *88*, 121-127.
- S13. Li, W.; Zou, J.; Huang, Y.; Wang, K.; Du, T.; Jiang, S.; Luo, Z. 212-kHz-linewidth, transform-limited pulses from a single-frequency Q-switched fiber laser based on a few-layer Bi<sub>2</sub>Se<sub>3</sub> saturable absorber. *Photon. Res.* **2018**, *6*, C29-C35.
- S14. Guo, Q.; Pan, J.; Liu, Y.; Si, H.; Lu, Z.; Han, X.; Gao, J.; Zuo, Z.; Zhang, H.; Jiang, S. Output energy enhancement in a mode-locked Er-doped fiber laser using CVD-Bi<sub>2</sub>Se<sub>3</sub> as a saturable absorber. *Opt. Express* **2019**, *27*, 24670-24681.
- S15. Xu, N.; Ming, N.; Han, X.; Man, B.; Zhang, H. Large-energy passively Q-switched Er-doped fiber laser based on CVD-Bi<sub>2</sub>Se<sub>3</sub> as saturable absorber. *Opt. Mater. Express* **2019**, *9*, 373-383.
- S16. Shang, J.; Feng, T.; Zhao, S.; Li, T.; Pan, Z.; Zhao, J. Saturable absorption characteristics of Bi<sub>2</sub>Se<sub>3</sub> in a 2 μm Q-switching bulk laser. *Opt. Express* **2020**, *28*, 5639-5647.

- S17. Boguslawski, J.; Sotor, J.; Sobon, G.; Tarka, J.; Jagiello, J.; Macherzynski, W.; Lipinska, L.; Abramski, K., Mode-locked Er-doped fiber laser based on liquid phase exfoliated  $\text{Sb}_2\text{Te}_3$  topological insulator. *Laser Phys.* **2014**, *24*, 105111.
- S18. Sotor, J.; Sobon, G.; Grodecki, K.; Abramski, K. Mode-locked erbium-doped fiber laser based on evanescent field interaction with  $\text{Sb}_2\text{Te}_3$  topological insulator. *Appl. Phys. Lett.* **2014**, *104*, 251112.
- S19. Boguslawski, J.; Sobon, G.; Zybala, R.; Sotor, J. Dissipative soliton generation in Er-doped fiber laser mode-locked by  $\text{Sb}_2\text{Te}_3$  topological insulator. *Opt. Lett.* **2015**, *40*, 2786-2789.
- S20. Bogusławski, J.; Soboń, G.; Zybala, R.; Mars, K.; Mikuła, A.; Abramski, K.; Sotor, J. Investigation on pulse shaping in fiber laser hybrid mode-locked by  $\text{Sb}_2\text{Te}_3$  saturable absorber. *Opt. Express* **2015**, *23*, 29014-29023.
- S21. Yan, P.; Chen, H.; Li, K.; Guo, C.; Ruan, S.; Wang, J.; Ding, J.; Zhang, X.; Guo, T. Q-switched fiber laser using a fiber-tip-integrated TI saturable absorption mirror. *IEEE Photon. J.* **2016**, *8*, 1-6.
- S22. Liu, W.; Pang, L.; Han, H.; Tian, W.; Chen, H.; Lei, M.; Yan, P.; Wei, Z. 70-fs mode-locked erbium-doped fiber laser with topological insulator. *Sci. Rep.* **2016**, *6*, 19997.
- S23. Wang, J.; Yin, J.; He, T.; Yan, P.  $\text{Sb}_2\text{Te}_3$  mode-locked ultrafast fiber laser at 1.93  $\mu\text{m}$ . *Chin. Phys. B* **2018**, *27*, 084214.
- S24. Bogusławski, J.; Soboń, G.; Zybala, R.; Sotor, J. Towards an optimum saturable absorber for the multi-gigahertz harmonic mode locking of fiber lasers. *Photon. Res.* **2019**, *7*, 1094-1100.
- S25. Zhu, X.; Chen, S.; Zhang, M.; Chen, L.; Wu, Q.; Zhao, J.; Jiang, Q.; Zheng, Z.; Zhang, H.  $\text{TiS}_2$ -based saturable absorber for ultrafast fiber lasers. *Photon. Res.* **2018**, *6*, C44-C48.
- S26. Ge, Y.; Zhu, Z.; Xu, Y.; Chen, Y.; Chen, S.; Liang, Z.; Song, Y.; Zou, Y.; Zeng, H.;

Xu, S.; Zhang, H.; Fan, D. Broadband nonlinear photoresponse of 2D TiS<sub>2</sub> for ultrashort pulse generation and all-optical thresholding devices. *Adv. Opt. Mater.* **2018**, *6*, 1701166.

S27. Shang, X.; Guo, L.; Zhang, H.; Li, D.; Yue, Q. Passive mode-locked Er-doped fiber laser pulse generation based on titanium disulfide saturable absorber. *Front. Inf. Technol. Electron. Eng.* **2021**, *22*, 756-766.
